# Supplementary material for: 2b-RAD Genotyping of the Seagrass Cymodocea nodosa Along a Latitudinal Cline Identifies Candidate Genes for Environmental Adaptation
Source: Front Genet. 2022 May 16;13:866758. doi: 10.3389/fgene.2022.866758 (PMC9149362; doi:10.3389/fgene.2022.866758)
Supplement: Supplementary file 3 [file DataSheet1.xlsx]

## Sheet: Table S1
Table S1. PCR conditions for multiplexing. All primers were assembled in the same multiplex. Primer concentrations are provided. All other conditions and annealing temperature are reported in the text
Locus	Repeat	Dye	[primer] pmol
Cy 1	(CT)16	PET	2
Cy 3	(GA)12	NED	2
Cy 4	(TAA)9	6-FAM	1
Cy 16	(CA)8(CT)22	PET	1.5
Cy 17	(CT)17CG(AT)10	6-FAM	4
Cy 18	(CA)16	VIC	4
Cy 20	(TC)19	NED	10

## Sheet: Table S2
Table S2. Sequencing statistics for all individuals used in this study from the three sampling sites (Ebro - EB, Faro - FA, Gran Canaria - GC)
Sample ID (technical replicates are in italic)	Population	Nreads
SE-2189-EB41	Ebro	1371878
SE-2189-EB42	Ebro	1061504
SE-2189-EB43	Ebro	968042
SE-2189-EB44	Ebro	1273920
SE-2189-EB45	Ebro	600480
SE-2189-EB46	Ebro	1243091
SE-2189-EB47	Ebro	1062846
SE-2189-EB48	Ebro	1289091
SE-2189-EB49	Ebro	1171182
SE-2189-EB50	Ebro	1561403
SE-2189-EB51	Ebro	1145129
SE-2189-EB52	Ebro	1354371
SE-2189-EB53	Ebro	870295
SE-2189-EB54	Ebro	329655
SE-2189-EB55	Ebro	1004368
SE-2189-EB56	Ebro	1000487
SE-2189-EB57	Ebro	325467
SE-2189-EB58	Ebro	1026888
SE-2189-EB59	Ebro	564511
SE-2189-EB60	Ebro	241213
SE-2189-EB69	Ebro	1227108
SE-2189-EB70	Ebro	1133944
SE-2189-EB71	Ebro	1068683
SE-2189-EB72	Ebro	605166
SE-2189-FA21	Faro	2044048
SE-2189-FA22	Faro	1280482
SE-2189-FA23	Faro	1219544
SE-2189-FA24	Faro	1236467
SE-2189-FA25	Faro	1264205
SE-2189-FA26	Faro	1887969
SE-2189-FA27	Faro	1054948
SE-2189-FA28	Faro	1437071
SE-2189-FA29	Faro	1134188
SE-2189-FA30	Faro	1231737
SE-2189-FA31	Faro	1111417
SE-2189-FA32	Faro	1131307
SE-2189-FA33	Faro	2016813
SE-2189-FA34	Faro	1213648
SE-2189-FA35	Faro	1502145
SE-2189-FA36	Faro	1532396
SE-2189-FA37	Faro	1854987
SE-2189-FA38	Faro	943497
SE-2189-FA39	Faro	942254
SE-2189-FA40	Faro	1246522
SE-2189-FA65	Faro	1214124
SE-2189-FA66	Faro	2083233
SE-2189-FA67	Faro	1526274
SE-2189-FA68	Faro	1375809
SE-2189-GC1	GranCanaria	1288001
SE-2189-GC2	GranCanaria	2460021
SE-2189-GC3	GranCanaria	1504126
SE-2189-GC4	GranCanaria	1236320
SE-2189-GC5	GranCanaria	1032418
SE-2189-GC6	GranCanaria	898443
SE-2189-GC9	GranCanaria	1492807
SE-2189-GC10	GranCanaria	1173978
SE-2189-GC11	GranCanaria	1203554
SE-2189-GC12	GranCanaria	981779
SE-2189-GC13	GranCanaria	1068749
SE-2189-GC14	GranCanaria	1157276
SE-2189-GC15	GranCanaria	1283485
SE-2189-GC16	GranCanaria	9640
SE-2189-GC17	GranCanaria	547597
SE-2189-GC18	GranCanaria	864454
SE-2189-GC19	GranCanaria	1453416
SE-2189-GC20	GranCanaria	832651
SE-2189-GC61	GranCanaria	1356675
SE-2189-GC62	GranCanaria	1965460
SE-2189-GC63	GranCanaria	1026584
SE-2189-GC64	GranCanaria	1059968
	Average Nreads	1.18405e+06
	Total Nreads	82883209

## Sheet: Table S3
Table S3. Mapping statistics for all individuals used in this study from the three sampling sites (Ebro - EB, Faro - FA, Gran Canaria - GC)
Sample ID (technical replicates are in italic)	Population	N genotyped loci	Mean depth
SE-2189-EB41	Ebro	7528	49.5577
SE-2189-EB42	Ebro	7435	41.1492
SE-2189-EB43	Ebro	7494	33.516
SE-2189-EB44	Ebro	7488	46.7226
SE-2189-EB45	Ebro	7408	22.7689
SE-2189-EB46	Ebro	7548	43.3426
SE-2189-EB47	Ebro	7151	38.9762
SE-2189-EB48	Ebro	7142	43.2354
SE-2189-EB50	Ebro	7483	48.5102
SE-2189-EB51	Ebro	7423	41.7357
SE-2189-EB52	Ebro	7465	48.092
SE-2189-EB53	Ebro	7444	26.5716
SE-2189-EB55	Ebro	7376	25.6479
SE-2189-EB56	Ebro	7352	36.5132
SE-2189-EB57	Ebro	6826	14.0872
SE-2189-EB58	Ebro	7461	34.4111
SE-2189-EB69	Ebro	7521	45.2549
SE-2189-EB70	Ebro	7468	43.0894
SE-2189-EB71	Ebro	7424	40.787
SE-2189-EB72	Ebro	7428	23.0117
SE-2189-FA21	Faro	7545	37.782
SE-2189-FA22	Faro	7518	29.7999
SE-2189-FA23	Faro	7538	31.6465
SE-2189-FA24	Faro	7521	32.8394
SE-2189-FA25	Faro	7506	30.3188
SE-2189-FA26	Faro	7547	42.1142
SE-2189-FA27	Faro	7524	34.9548
SE-2189-FA28	Faro	7513	38.696
SE-2189-FA29	Faro	7461	30.0008
SE-2189-FA30	Faro	7535	29.0295
SE-2189-FA31	Faro	7447	28.2862
SE-2189-FA32	Faro	7418	36.7234
SE-2189-FA33	Faro	7549	40.4442
SE-2189-FA34	Faro	7542	40.7102
SE-2189-FA35	Faro	7545	41.6778
SE-2189-FA36	Faro	7545	36.2502
SE-2189-FA37	Faro	7549	38.4503
SE-2189-FA38	Faro	6997	38.8831
SE-2189-FA39	Faro	7281	35.4046
SE-2189-FA40	Faro	7499	25.8508
SE-2189-FA65	Faro	7496	29.6653
SE-2189-FA66	Faro	7554	41.9699
SE-2189-FA67	Faro	7545	37.3327
SE-2189-FA68	Faro	7526	35.5577
SE-2189-GC1	GranCanaria	7495	44.3678
SE-2189-GC2	GranCanaria	7482	45.5474
SE-2189-GC3	GranCanaria	7522	48.1
SE-2189-GC4	GranCanaria	7519	41.9465
SE-2189-GC5	GranCanaria	7468	26.4379
SE-2189-GC6	GranCanaria	7455	31.1598
SE-2189-GC9	GranCanaria	7529	42.6536
SE-2189-GC11	GranCanaria	7505	38.1885
SE-2189-GC13	GranCanaria	7504	37.0193
SE-2189-GC14	GranCanaria	7520	39.3086
SE-2189-GC15	GranCanaria	7526	40.956
SE-2189-GC17	GranCanaria	7217	23.5131
SE-2189-GC18	GranCanaria	7174	19.8458
SE-2189-GC19	GranCanaria	7540	40.5216
SE-2189-GC20	GranCanaria	7259	31.7899
SE-2189-GC61	GranCanaria	7504	46.075
SE-2189-GC62	GranCanaria	7377	38.2368
SE-2189-GC63	GranCanaria	7447	35.025
SE-2189-GC64	GranCanaria	7386	38.0903
	Average	7444.37	36.5103

## Sheet: Table S4
Table S4. Details and total number of transitions and transversions identified within our dataset
Transitions
1686 A ↔ G	(585 A/G; 1101 G/A)
1673 C ↔ T	(1094 C/T; 579 T/C)
Tot	3359
Transversions
1594 A ↔ C	(1304 A/C; 290 C/A)
374 A ↔ T	(186 A/T; 188 T/A)
278 G ↔ C	(163 C/G; 215 G/C)
1857 G ↔ T	(361 G/T; 1496 T/G)
Tot	4203

## Sheet: Table S5
Table S5. Concordance in genotyping among technical replicates
Replicate pair	N genotyped loci	N matches	% matches
SE-2189-FA22:SE-2189-FA66	7517	7037	0.936
SE-2189-FA23:SE-2189-FA67	7538	7045	0.935
SE-2189-FA24:SE-2189-FA68	7521	7044	0.937
SE-2189-FA25:SE-2189-FA65	7506	5526	0.736
SE-2189-GC1:SE-2189-GC61	7495	6831	0.911
SE-2189-GC2:SE-2189-GC62	7482	6908	0.923
SE-2189-GC3:SE-2189-GC63	7522	7011	0.932
SE-2189-GC4:SE-2189-GC64	7519	6458	0.859
SE-2189-EB41:SE-2189-EB69	7528	6775	0.9
SE-2189-EB42:SE-2189-EB70	7435	6660	0.896
SE-2189-EB46:SE-2189-EB72	7547	6270	0.831
SE-2189-EB44:SE-2189-EB71	7487	6688	0.893
		Average	0.89075
		St Dev	0.0587292

## Sheet: Table S6
Table S6. Admixture cross-validation error
Admixture cross-validation error (minimum value is in bold)
CV error	(K=10): 0.45275
CV error	(K=11): 0.44844
CV error	(K=12): 0.52637
CV error	(K=13): 0.44661
CV error	(K=14): 0.31002
CV error	(K=15): 0.35006
CV error	(K=1): 0.47478
CV error	(K=2): 0.38353
CV error	(K=3): 0.28258
CV error	(K=4): 0.23900
CV error	(K=5): 0.25710
CV error	(K=6): 0.31406
CV error	(K=7): 0.30141
CV error	(K=8): 0.32327
CV error	(K=9): 0.30082

## Sheet: Table S7
Table S7. SSRs matrix of the three C. nodosa populations. Ebro - EB, Faro - FA, Gran Canaria - GC
Faro	Cy1		Cy3		Cy4		Cy16		Cy17		Cy18		Cy20
FA21	123	123	142	142	151	163	179	191	228	232	139	141	209	209
FA26	123	123	142	142	151	163	179	191	228	232	139	141	209	209
FA27	123	123	142	142	151	163	179	191	228	232	139	141	209	209
FA28	123	123	142	142	151	163	179	191	228	232	139	141	209	209
FA29	123	123	142	142	151	163	179	191	228	232	139	141	209	209
FA30	123	123	142	142	151	163	179	191	228	232	139	141	209	209
FA31	123	123	142	142	151	163	179	191	228	232	139	141	209	209
FA32	123	123	142	142	151	163	179	191	228	232	139	141	209	209
FA34	123	123	142	142	151	163	179	191	228	232	139	141	209	209
FA35	123	123	142	142	151	163	179	191	228	232	139	141	209	209
FA36	123	123	142	142	151	163	179	191	228	232	139	141	209	209
FA37	123	123	142	142	151	163	179	191	228	232	139	141	209	209
FA38	123	123	142	142	151	163	179	191	228	232	139	141	209	209
FA39	123	123	142	142	151	163	179	191	228	232	139	141	209	209
FA65	123	123	142	142	151	163	179	191	228	232	139	141	209	209
FA66	123	123	142	142	151	163	179	191	228	232	139	141	209	209
FA67	123	123	142	142	151	163	179	191	228	232	139	141	209	209
FA68	123	123	142	142	151	163	179	191	228	232	139	141	209	209
Ebro
EB47	123	129	142	142	151	163	175	201	226	228	139	153	193	193
EB48	123	123	142	150	166	166	201	201	228	228	151	151	193	193
EB50	123	129	142	142	163	163	175	175	228	230	151	151	193	193
EB51	123	123	142	142	163	163	175	175	228	232	151	151	193	193
EB53	123	129	142	142	153	166	173	201	228	228	137	151	176	193
EB55	123	129	142	142	151	166	0	0	228	228	151	151	0	0
EB56	123	129	142	148	151	159	173	173	226	256	151	151	193	193
EB57	123	129	142	148	151	151	177	177	226	228	137	151	193	193
EB58	123	123	142	142	159	159	173	201	226	226	141	141	193	193
EB69	123	129	142	142	159	159	173	173	226	228	137	151	193	195
EB70	123	129	142	142	159	159	173	173	226	228	137	151	193	195
EB72	123	129	142	142	151	166	173	201	226	228	151	151	176	193
Gran Canaria
GC5	123	123	140	140	151	151	175	175	224	232	141	141	195	195
GC6	123	123	140	140	151	151	175	175	224	232	141	141	195	195
GC9	123	123	140	140	151	151	191	191	224	224	141	141	195	195
GC11	123	123	140	140	151	151	175	191	224	232	141	141	195	195
GC15	123	123	140	140	151	151	175	191	224	232	141	141	195	195
GC17	123	123	140	142	151	151	191	191	224	224	141	141	195	195
GC18	123	123	140	140	151	151	175	191	224	232	141	141	195	195
GC19	123	123	140	140	151	151	175	175	224	224	141	141	195	195
GC20	123	123	140	140	151	151	175	175	224	232	141	141	195	195
GC62	123	123	140	140	151	151	175	191	224	232	141	141	195	195
GC63	123	123	140	140	151	151	175	191	224	232	141	141	195	195
GC64	123	123	140	142	151	163	175	191	232	232	141	141	195	195

## Sheet: Table S8
Table S8. Clonal determination, genetic diversity and differentiation based on SSR markes in the three C. nodosa poplations obtained with GIMLET and GenAlEx 6.503. Ebro - EB, Faro - FA, Gran Canaria - GC
Sampling site	Acronym	Coordinates	Total N	MLGs	R	Ho	F (fixation index)
Las Palmas de Gran Canaria – Canary Islands	GC	27°45'14''N, 15°40'18''W	12	6	0.454545	0.17	0.0731061
Ria Formosa lagoon – Faro, Portugal	FA	36°59'23''N, 7°50'01''W	18	1	0	0.57	-1
Ebro Delta, Spain	EB	40°34'48''N, 0°35'45''E	12	11	0.909091	0.45	0.0337511
Total			42	17
Pairwise Population Matrix of FST Values
	GranCanaria	Faro	Ebro
GranCanaria	0	0.0001	0.0001
Faro	0.474822	0	0.0001
Ebro	0.411023	0.276087	0
FST values below the diagonal. Probability, P(rand >= data) based on 9999 permutations is shown above diagonal.

## Sheet: Table S9
Table S9. Genic differentiation for each population pair (exact G test) as calculated by GENEPOP 4.7.5 with default Markov chain parameters (Dememorisation=10000, Batches=100, Iterations per batch=5000). Ebro - EB, Faro - FA, Gran Canaria - GC on the SNPs dataset
Population pair	Chi2	df	P-Value
EB & FA	11951.4	8750	Highly sign.
EB & GC	>18098.18913	9036	Highly sign.
FA & GC	9728.3	6614	Highly sign.
P-value for each population pair across all loci
(Fisher's method)

## Sheet: Table S10 
Table S10. Outliers loci identified via BayeScan and pcadapt across the three C. nodosa populations. Shared outliers are in bold
BayeScan outliers
Chrom	Pos	Prob	Log10(PO)	qval	Alpha	Fst
chr1	673698	0.76315	0.50814	0.23685	1.3048	0.7211
chr1	421195	0.76215	0.50574	0.23735	1.3525	0.72707
chr1	555347	0.75775	0.49527	0.23898	1.3004	0.71971
chr1	549579	0.75675	0.4929	0.24005	1.311	0.72114
chr2	19511	0.75415	0.48679	0.24121	1.3062	0.72021
chr1	379730	0.75175	0.48118	0.24238	1.2977	0.71905
chr2	1253	0.74535	0.46641	0.24413	1.3061	0.71928
chr1	645789	0.74035	0.45504	0.24607	1.2644	0.71331
chr1	656786	0.71674	0.40318	0.25021	1.2434	0.70803
pcadapt outliers
Chrom	Pos
chr1	21780
chr1	82744
chr1	90546
chr1	170821
chr1	210814
chr1	242135
chr1	266482
chr1	269373
chr1	271286
chr1	281293
chr1	309365
chr1	327953
chr1	333053
chr1	339470
chr1	343338
chr1	348594
chr1	358697
chr1	365704
chr1	369133
chr1	379730
chr1	385567
chr1	398525
chr1	415523
chr1	421195
chr1	426206
chr1	436392
chr1	446376
chr1	468705
chr1	468753
chr1	470661
chr1	474761
chr1	486570
chr1	498602
chr1	501496
chr1	503488
chr1	507099
chr1	508643
chr1	511012
chr1	511730
chr1	512456
chr1	513393
chr1	517237
chr1	520240
chr1	521337
chr1	534246
chr1	535304
chr1	537742
chr1	543008
chr1	545101
chr1	546361
chr1	547702
chr1	549579
chr1	555347
chr1	556274
chr1	556626
chr1	556913
chr1	567415
chr1	569340
chr1	569937
chr1	570496
chr1	577944
chr1	584171
chr1	584710
chr1	589348
chr1	589644
chr1	591570
chr1	595307
chr1	598895
chr1	607240
chr1	609757
chr1	613590
chr1	614509
chr1	615044
chr1	615438
chr1	615724
chr1	615775
chr1	616353
chr1	617325
chr1	618553
chr1	621236
chr1	623178
chr1	627990
chr1	628552
chr1	631838
chr1	631942
chr1	632454
chr1	637564
chr1	645789
chr1	646110
chr1	646649
chr1	646945
chr1	655136
chr1	656786
chr1	658483
chr1	659852
chr1	665659
chr1	668711
chr1	670527
chr1	671440
chr1	671996
chr1	673507
chr1	673698
chr1	680576
chr1	680733
chr1	681240
chr2	568
chr2	1133
chr2	1253
chr2	12670
chr2	18864
chr2	19511
chr2	32395
chr2	48178
chr2	52225
chr2	52747
chr2	54983
chr2	77538
chr2	78342
chr2	95690
chr2	103454
chr2	105059
chr2	113300
chr2	115593
chr2	121571
chr2	128600
chr2	133545
chr2	135186
chr2	138062
chr2	141691
chr2	158139
chr2	160240
chr2	163144
chr2	165310
chr2	165848
chr2	171290
chr2	180098
chr2	180258
chr2	186304
chr2	192483
chr2	196355
chr2	197868
chr2	204850
chr2	208780
chr2	213589
chr2	213943
chr2	214766
chr2	216848
chr2	217209
chr2	217369
chr2	223639
chr2	230312
chr2	230834
chr2	234532
chr2	239872
chr2	261644
chr2	269940
chr2	271588
chr2	272702
chr2	273229
chr2	275822
chr2	284121
chr2	286515
chr2	303701
chr2	306667
chr2	309682
chr2	312402
chr2	323342
chr2	331193
chr2	354464
chr2	362117
chr2	386498
chr2	399086
chr2	415757
chr2	420397
chr2	441761
chr2	465339
chr2	468192
chr2	478667
chr2	489150
chr2	534243
chr2	555276
chr2	572151
chr2	633522
chr2	673621
chr3	6902
chr3	67391
chr8	667618
chr28	70087

[truncated: 2 more sheets: Table S11, Table S12]
